# Supplementary material for: Ridge Cultivation for the Adaption of Fodder Maize (Zea mays L.) to Suboptimal Conditions of Low Mountain Ranges in Organic Farming in Central Europe
Source: MDPI journal article supplement (doi:10.3390/agriculture13030650), 2023-03-09
Supplement: s1 [file s1]

**Table S1.** Results of one-factorial statistical analysis (*Tukey-Kramer*) of nitrate- ( $\text{NO}_3^-$ -N) and ammonium- ( $\text{NH}_4^+$ -N) contents at BBCH stages 17 (7 leaves unfolded), 55 (middle of tassel emergence), 71 (beginning of grain development) and 89 (fully ripe). Arithmetic means  $\pm$  standard error. Data from Environment Bergen 2020 (BR20). Four replications. Significance at  $p < 0.05$ . Different letters indicate significance.

| BBCH Stage | Soil depth [m] | Unit                   | NO <sub>3</sub> <sup>-</sup> -N <sup>1</sup> |                  | NH <sub>4</sub> <sup>+</sup> -N <sup>2</sup> |               |
|------------|----------------|------------------------|----------------------------------------------|------------------|----------------------------------------------|---------------|
|            |                |                        | FCM <sup>3</sup>                             | RCM <sup>4</sup> | FCM                                          | RCM           |
| 17         | 0 to 0.3       | [kg ha <sup>-1</sup> ] | 17.82 ± 4.04                                 | 11.59 ± 1.99     | 4.13 ± 1.35                                  | 1.88 ± 0.47   |
| 55         |                |                        | 26.16 ± 5.61                                 | 29.29 ± 1.12     | 0.73 ± 0.22                                  | 0.78 ± 0.15   |
| 71         |                |                        | 11.97 ± 1.85 b                               | 35.53 ± 9.06 a   | 0.43 ± 0.06 b                                | 0.82 ± 0.13 a |
| 89         |                |                        | 7. 91 ± 1.02                                 | 11.38 ± 0.81     | 0.80 ± 0.31                                  | 1.05 ± 0.25   |
| 17         | 0.3 to 0.6     |                        | 5.63 ± 3.78                                  | 3.00 ± 0.79      | 0.61 ± 0.18                                  | 0.44 ± 0.09   |
| 55         |                |                        | 8.82 ± 1.49                                  | 5.46 ± 1.98      | 0.23 ± 0.09                                  | 0.17 ± 0.03   |
| 71         |                |                        | 7.59 ± 3.00                                  | 5.06 ± 0.65      | 0.19 ± 0.02 b                                | 0.25 ± 0.02 a |
| 89         |                |                        | 3.10 ± 0.72                                  | 3.94 ± 0.82      | 0.28 ± 0.08                                  | 0.27 ± 0.06   |
| 17         | 0.6 to 0.9     |                        | 9.63 ± 3.05                                  | 6.38 ± 0.53      | 0.51 ± 0.02                                  | 0.36 ± 0.01   |
| 55         |                |                        | 9.69 ± 1.24                                  | 11.62 ± 4.53     | 0.29 ± 0.07                                  | 0.21 ± 0.13   |
| 71         |                |                        | 9.36 ± 0.89                                  | 7.30 ± 0.88      | 0.21 ± 0.02                                  | 0.17 ± 0.04   |
| 89         |                |                        | 7.46 ± 0.94                                  | 7.07 ± 0.91      | 0.22 ± 0.03                                  | 0.26 ± 0.04   |

<sup>1</sup> Nitrate nitrogen content <sup>2</sup> Ammonium nitrogen content <sup>3</sup> Flat cultivation method <sup>4</sup> Ridge cultivation method.

**Table S2.** Results of one-factorial statistical analysis (*Tukey-Kramer*) of maize plant development at BBCH stages 17 (7 leaves unfolded) and 55 (middle of tassel emergence). Arithmetic means  $\pm$  standard error. Data from Environment Bergen 2020 (BR20). Four replications per parameter. Significance  $p < 0.05$ . Different letters indicate significance.

| Parameter                                    | Unit                   | BBCH 17          |                  | BBCH 55           |                    |
|----------------------------------------------|------------------------|------------------|------------------|-------------------|--------------------|
|                                              |                        | FCM <sup>1</sup> | RCM <sup>2</sup> | FCM               | RCM                |
| Fresh matter yield (whole plant)             |                        | 1.78 $\pm$ 0.39  | 2.13 $\pm$ 0.66  | 1.25 $\pm$ 2.41   | 1.55 $\pm$ 2.18    |
| Dry matter yield (whole plant)               |                        | 0.19 $\pm$ 0.04  | 0.23 $\pm$ 0.06  | 1.55 $\pm$ 0.27   | 2.03 $\pm$ 0.29    |
| Fresh matter yield (roots)                   | [t ha <sup>-1</sup> ]  | 0.42 $\pm$ 0.07  | 0.54 $\pm$ 0.13  | -                 | -                  |
| Dry matter yield (roots)                     |                        | 0.04 $\pm$ 0.007 | 0.05 $\pm$ 0.01  | -                 | -                  |
| Dry matter yield (leaves)                    |                        | -                | -                | 0.90 $\pm$ 0.13   | 1.03 $\pm$ 0.12    |
| Dry Matter yield (stem)                      |                        | -                | -                | 0.69 $\pm$ 0.16   | 1.05 $\pm$ 0.23    |
| Average FM weight (whole plant) <sup>3</sup> |                        | 13.73 $\pm$ 2.21 | 18.96 $\pm$ 5.86 | 99.49 $\pm$ 20.59 | 139.19 $\pm$ 22.45 |
| Average FM weight (leaves) <sup>3</sup>      | [g]                    | -                | -                | 38.33 $\pm$ 5.93  | 49.02 $\pm$ 5.57   |
| Average FM weight (stem) <sup>3</sup>        |                        | -                | -                | 58.05 $\pm$ 14.06 | 86.52 $\pm$ 17.09  |
| N accumulation (whole plant)                 |                        | 4.43 $\pm$ 0.96  | 5.67 $\pm$ 1.94  | 20.22 $\pm$ 2.65  | 26.57 $\pm$ 5.12   |
| N accumulation (roots)                       | [kg ha <sup>-1</sup> ] | 0.45 $\pm$ 0.11  | 0.58 $\pm$ 0.15  | -                 | -                  |
| N accumulation (leaves)                      |                        | -                | -                | 14.52 $\pm$ 2.36  | 17.28 $\pm$ 3.11   |
| N accumulation (stems)                       |                        | -                | -                | 5.92 $\pm$ 1.24   | 7.74 $\pm$ 1.47    |
| N concentration (whole plant)                |                        | 2.27 $\pm$ 0.18  | 2.36 $\pm$ 0.18  | 1.35 $\pm$ 0.13   | 1.28 $\pm$ 0.06    |
| N concentration (roots)                      | [%]                    | 1.06 $\pm$ 0.09  | 1.14 $\pm$ 0.07  | 0.66 $\pm$ 0.03   | 0.61 $\pm$ 0.04    |
| N concentration (leaves)                     |                        | -                | -                | 1.61 $\pm$ 0.12   | 1.65 $\pm$ 0.11    |
| N concentration (stem)                       |                        | -                | -                | 0.88 $\pm$ 0.04   | 0.75 $\pm$ 0.03    |
| P accumulation (whole plant)                 | [kg ha <sup>-1</sup> ] | 14.00 $\pm$ 4.00 | 17.00 $\pm$ 6.00 | 122.00 $\pm$ 9.00 | 117.00 $\pm$ 21.00 |
| C:N ratio (whole plant)                      |                        | 17.72 $\pm$ 1.10 | 17.17 $\pm$ 1.66 | 32.90 $\pm$ 3.17  | 34.43 $\pm$ 1.38   |
| C:N ratio (roots)                            | %                      | 41.33 $\pm$ 3.48 | 38.14 $\pm$ 2.43 | 68.32 $\pm$ 3.11  | 70.82 $\pm$ 6.68   |
| C:N ratio (leaves)                           |                        | -                | -                | 29.06 $\pm$ 2.12  | 28.64 $\pm$ 1.87   |
| C:N ratio (stem)                             |                        | -                | -                | 48.33 $\pm$ 2.15  | 57.92 $\pm$ 2.96   |

<sup>1</sup> Flat cultivation method. <sup>2</sup> Ridge cultivation method. <sup>3</sup> Average FM weight of a single maize plant.

**Table S3.** Results of one-factorial statistical analysis of maize plants development with *Tukey-Kramer*. Arithmetic means  $\pm$  standard error of all Environments. Eight replications for Bösenbrunn 2017 (BB17) and Oberhermsgrün 2018 (OG18), Four replications for Bergen 2020 (BR20). Significant difference at  $p < 0.05$ . Different letters indicate significance.

| Parameter                                                 | Unit                   | BB17 <sup>1</sup>  |                    | OG18 <sup>2</sup>  |                    | BR20 <sup>3</sup>    |                      |
|-----------------------------------------------------------|------------------------|--------------------|--------------------|--------------------|--------------------|----------------------|----------------------|
|                                                           |                        | FCM <sup>4</sup>   | RCM <sup>5</sup>   | FCM                | RCM                | FCM                  | RCM                  |
| Fresh matter yield (whole plant) <sup>6</sup>             |                        | 38.03 $\pm$ 2.08 b | 48.08 $\pm$ 2.56 a | 15.02 $\pm$ 0.94   | 14.75 $\pm$ 0.49   | 29.34 $\pm$ 2.91     | 29.97 $\pm$ 2.21     |
| Dry matter yield (whole plant) <sup>6</sup>               | [t ha <sup>-1</sup> ]  | 11.36 $\pm$ 0.86 b | 15.04 $\pm$ 1.08 a | 3.86 $\pm$ 0.31    | 4.17 $\pm$ 0.21    | 7.13 $\pm$ 0.88      | 7.69 $\pm$ 0.96      |
| Dry matter yield (leaves and husk) <sup>6</sup>           |                        | 3.30 $\pm$ 0.22 b  | 4.36 $\pm$ 0.32 a  | 1.11 $\pm$ 0.08    | 1.25 $\pm$ 0.06    | 1.99 $\pm$ 0.26      | 2.17 $\pm$ 0.03      |
| Dry matter yield (stem) <sup>6</sup>                      |                        | 2.25 $\pm$ 0.18 b  | 3.04 $\pm$ 0.25 a  | 1.19 $\pm$ 0.12    | 1.23 $\pm$ 0.07    | 2.08 $\pm$ 0.25      | 1.95 $\pm$ 0.22      |
| Dry matter yield (corn cob) <sup>6</sup>                  |                        | 6.91 $\pm$ 0.55 b  | 8.97 $\pm$ 0.64 a  | 1.56 $\pm$ 0.15    | 1.69 $\pm$ 0.10    | 3.05 $\pm$ 0.51 b    | 3.57 $\pm$ 0.53 a    |
| Leaves and stem proportion of total DM yield <sup>6</sup> | [%]                    | 39.38 $\pm$ 2.12   | 40.21 $\pm$ 1.10   | 59.73 $\pm$ 1.77   | 59.44 $\pm$ 1.37   | 57.64 $\pm$ 2.03     | 54.15 $\pm$ 1.87     |
| Corn cob proportion of total DM yield <sup>6</sup>        |                        | 60.62 $\pm$ 2.12   | 59.79 $\pm$ 1.10   | 40.27 $\pm$ 1.77   | 40.56 $\pm$ 1.37   | 42.36 $\pm$ 2.03     | 45.85 $\pm$ 1.87     |
| Crude protein yield (whole plant) <sup>6</sup>            | [kg ha <sup>-1</sup> ] | 645.05 $\pm$ 59.23 | 819.95 $\pm$ 63.75 | 292.09 $\pm$ 25.81 | 306.34 $\pm$ 15.28 | 467.01 $\pm$ 54.86   | 486.78 $\pm$ 46.15   |
| Crude protein yield (leaves and stem) <sup>6</sup>        |                        | 252.91 $\pm$ 23.77 | 330.25 $\pm$ 27.98 | 174.18 $\pm$ 15.40 | 182.50 $\pm$ 10.85 | 267.18 $\pm$ 28.77   | 261.67 $\pm$ 20.24   |
| Crude protein yield (corn cob) <sup>6</sup>               |                        | 392.15 $\pm$ 41.55 | 489.69 $\pm$ 38.20 | 117.91 $\pm$ 12.42 | 123.84 $\pm$ 6.44  | 199.83 $\pm$ 28.34 b | 225.11 $\pm$ 27.09 a |
| N accumulation (whole plant) <sup>7</sup>                 | [kg ha <sup>-1</sup> ] | -                  | -                  | 49.49 $\pm$ 5.46   | 61.87 $\pm$ 13.40  | 89.03 $\pm$ 10.54    | 101.29 $\pm$ 8.36    |
| N accumulation (leaves and husk) <sup>7</sup>             |                        | -                  | -                  | 13.24 $\pm$ 1.59   | 13.36 $\pm$ 0.83   | 26.87 $\pm$ 1.94     | 28.57 $\pm$ 3.84     |
| N accumulation (stem) <sup>7</sup>                        |                        | -                  | -                  | 7.45 $\pm$ 0.80    | 8.74 $\pm$ 0.58    | 8.66 $\pm$ 0.74      | 8.40 $\pm$ 0.52      |
| N accumulation (corn cob) <sup>7</sup>                    |                        | -                  | -                  | 23.55 $\pm$ 2.60   | 26.41 $\pm$ 2.26   | 41.54 $\pm$ 4.16     | 44.72 $\pm$ 3.13     |
| P accumulation (whole plant) <sup>7</sup>                 | [kg ha <sup>-1</sup> ] | -                  | -                  | 6.43 $\pm$ 0.69    | 5.96 $\pm$ 0.61    | 2.57 $\pm$ 0.15      | 2.64 $\pm$ 0.08      |
| N concentration (whole plant) <sup>7</sup>                | [%]                    | -                  | -                  | 1.30 $\pm$ 0.05    | 1.44 $\pm$ 0.22    | 1.23 $\pm$ 0.06      | 1.26 $\pm$ 0.11      |
| N concentration (leaves and husk) <sup>7</sup>            |                        | -                  | -                  | 1.19 $\pm$ 0.04    | 1.09 $\pm$ 0.04    | 1.37 $\pm$ 0.05      | 1.32 $\pm$ 0.08      |
| N concentration (stem) <sup>7</sup>                       |                        | -                  | -                  | 0.68 $\pm$ 0.05    | 0.70 $\pm$ 0.03    | 0.41 $\pm$ 0.01      | 0.43 $\pm$ 0.03      |
| N concentration (corn cob) <sup>7</sup>                   |                        | -                  | -                  | 1.51 $\pm$ 0.04    | 1.61 $\pm$ 0.04    | 1.37 $\pm$ 0.04      | 1.30 $\pm$ 0.08      |
| C:N ratio (whole plant) <sup>7</sup>                      | [%]                    | -                  | -                  | 33.15 $\pm$ 0.58   | 31.61 $\pm$ 3.57   | 34.86 $\pm$ 1.55     | 35.57 $\pm$ 2.92     |
| C:N ratio (leaves and husk) <sup>7</sup>                  |                        | -                  | -                  | 36.76 $\pm$ 0.97   | 41.05 $\pm$ 1.35   | 32.03 $\pm$ 1.18     | 33.86 $\pm$ 2.64     |
| C:N ratio (stem) <sup>7</sup>                             |                        | -                  | -                  | 62.14 $\pm$ 4.05   | 60.29 $\pm$ 1.40   | 107.65 $\pm$ 3.32    | 102.08 $\pm$ 6.28    |
| C:N ratio (corn cob) <sup>7</sup>                         |                        | -                  | -                  | 28.71 $\pm$ 0.18   | 28.75 $\pm$ 0.69   | 32.53 $\pm$ 1.12     | 33.14 $\pm$ 1.86     |

<sup>1</sup> Bösenbrunn 2017 <sup>2</sup> Oberhermsgrün 2018 <sup>3</sup> Bergen 2020 <sup>4</sup> Flat cultivation method. <sup>5</sup> Ridge cultivation method <sup>6</sup> Values from BB17, OG18 and BR20. <sup>7</sup> Values from OG18 and BR20
